# Supplementary material
Source: HighWire-hosted journal article supplement (http://bmjopenquality.bmj.com/highwire/filestream/147412/field_highwire_adjunct_files/0/bmjoq-2023-002480supp001_data_supplement.pdf)
Supplement: bmjoq-2023-002480supp001_data_supplement.pdf [file bmjoq-2023-002480supp001_data_supplement.pdf]

**Supplemental Table 1 Post-Intervention Survey**

The post-intervention survey utilized the Kirkpatrick model to assess the impact of the lecture, audits and feedback on the management of hyperglycemia. The survey table presents the responses to each question with the corresponding percentages and Kirkpatrick level assessed.

| Post-intervention survey                                                                                                                                                                             |                   |          |         |         |                |                   |
|------------------------------------------------------------------------------------------------------------------------------------------------------------------------------------------------------|-------------------|----------|---------|---------|----------------|-------------------|
| Questions                                                                                                                                                                                            | Strongly disagree | Disagree | Neutral | Agree   | Strongly agree | Kirkpatrick level |
| I would like to continue receiving feedback by pharmacy about my inpatient management of hyperglycemia while rotating in wards                                                                       | 0% (0)            | 0% (0)   | 18% (2) | 36% (4) | 46% (5)        | 1<br>(Reaction)   |
| Based on my experience with this QI project using pharmacy and an audit and feedback on inpatient hyperglycemia management, I would recommend this model for other areas of training                 | 0% (0)            | 0% (0)   | 18% (2) | 46% (5) | 36% (4)        | 1<br>(Reaction)   |
| The interventions of the QI project including the lecture audits and feedback improved my knowledge on inpatient hyperglycemia management                                                            | 0% (0)            | 0% (0)   | 0% (0)  | 55% (6) | 46% (5)        | 2<br>(Learning)   |
| I changed my hyperglycemia management based on the audits and feedback provided by pharmacy                                                                                                          | 0% (0)            | 0% (0)   | 9% (1)  | 63% (7) | 27% (3)        | 3<br>(Impact)     |
| The “New endocrine society guidelines for the management of hyperglycemia in hospitalized patients in non-critically ill settings” changed my management of hospitalized patients with hyperglycemia | 0% (0)            | 0% (0)   | 20% (2) | 40% (4) | 40% (4)        | 3<br>(Impact)     |
| The audit and feedback provided by pharmacy helped me achieve adequate glycemic control in my patients with hyperglycemia                                                                            | 0% (0)            | 0% (0)   | 9% (1)  | 63% (7) | 27% (3)        | 4<br>(Results)    |
| The interventions of the QI project including the lecture, audits and feedback had a positive impact on our patient’s health                                                                         | 0% (0)            | 0% (0)   | 0% (0)  | 73% (8) | 27% (3)        | 4<br>(Results)    |
